# Supplementary material
Source: publisher site journal article supplement (https://www.dovepress.com/article/497970)
Supplement: Supplementary file 1 [file get_supplementary_file.php]

Supplementary Table 1.1 Risk analysis of MS factor and elevated E/e'[n（%）] analysis1

|  | E/e’ higher | OR（95%CI） | p |
| --- | --- | --- | --- |
| Non-MS（n=193） | 102（52.8） |  |  |
| MS（n=193） | 123（63.7) | 1.568（1.043-2.356) | 0.039 |
| Three MS factors (n=105) | 63（60.0） | 1.338（0.826-2.167） | 0.287 |
| Four MS factors（n=65） | 41（63.1） | 1.524（0.855-2.716） | 0.197 |
| Five MS factors（n=23） | 19（82.6） | 4.238（1.390-12.919) | 0.007 |

Supplementary Table 1.2 Risk analysis of MS factor and elevated E/e'[n（%）] analysis2

| Before matching | | | | After matching* | | | | |
| --- | --- | --- | --- | --- | --- | --- | --- | --- |
| Group | High E/e’ | OR（95%CI） | p | | Group | High E/e’ | OR（95%CI） | p |
| Non-MS（n=193） | 102（52.8） |  |  | | Non-MS（n=180） | 94（52.2） |  |  |
| MS（n=193） | 123（63.7) | 1.568（1.043-2.356) | 0.039 | | MS（n=180） | 115（63.9) | 1.619（1.061-2.468) | 0.025 |
| Three MS factors（n=105) | 63（60.0） | 1.338（0.826-2.167） | 0.287 | | Three MS factors（n=102） | 61（59.8） | 1.316（0.832-2.227） | 0.269 |

*: After adjusting for AHI and LSpO2

Supplementary Table 2 E/e' logistic regression analysis of different groups

| Variables | Regression analysis | | | | | |
| --- | --- | --- | --- | --- | --- | --- |
|  | B-value | standard error | Wald-value | OR | 95%CI of OR | p |
| SBP（mmHg） | 0.031 | 0.008 | 14.388 | 1.031 | 1.015-1.047 | ＜0.001 |
| DBP （mmHg） | -0.006 | 0.012 | 0.220 | 0.970 | 0.970-1.019 | 0.639 |

Abbreviations: SBP, systolic blood pressure; DBP, diastolic blood pressure
